## RESEARCH ARTICLE

# A phantom study to assess the reproducibility, robustness and accuracy of PET image segmentation methods against statistical fluctuations

Mahbubunnabi Tamal \*

Department of Biomedical Engineering, College of Engineering, Imam Abdulrahman Bin Faisal University, Dammam, Saudi Arabia

\* [mtamal@yahoo.com](mailto:mtamal@yahoo.com), [mtamal@iau.edu.sa](mailto:mtamal@iau.edu.sa)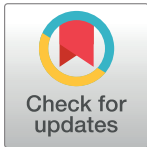 OPEN ACCESS

**Citation:** Tamal M (2019) A phantom study to assess the reproducibility, robustness and accuracy of PET image segmentation methods against statistical fluctuations. PLoS ONE 14(7): e0219127. <https://doi.org/10.1371/journal.pone.0219127>

**Editor:** Huafeng Liu, Zhejiang University, CHINA

**Received:** October 31, 2018

**Accepted:** June 17, 2019

**Published:** July 8, 2019

**Copyright:** © 2019 Mahbubunnabi Tamal. This retracted article was originally published as an open access article distributed under the terms of the [Creative Commons Attribution License](https://creativecommons.org/licenses/by/4.0/). However, PLOS did not receive documentation confirming that the data owner(s) granted permission or a license for use of the presented data or for publication of this work.

**Data Availability Statement:** The Data Availability Statement was deleted at the time of the article's removal. See the accompanying retraction notice for more information.

**Funding:** This study was funded by the Deanship of Scientific Research (DSR), Imam Abdulrahman Bin Faisal University, Dammam, Saudi Arabia (grant number 2016-212-Eng).

**Competing interests:** The author declares that he has no conflict of interest.
